# Supplementary material for: Changes in the Fruit Quality Parameters of Medlar Fruit (Mespilus germanica L.) after Heat Treatment, Storage, Freezing or Hoarfrost
Source: MDPI journal article supplement (doi:10.3390/foods12163077), 2023-08-16
Supplement: s1 [file s1]

**Table S1.** Identification and mean ( $\pm$  standard error) content (mg/kg FW) (n=6) of phenolic compounds in fresh medlar fruits at technological maturity in negative ions with HPLC-MS, MS<sup>2</sup> and MS<sup>3</sup>.

| Peak No.*      | Phenolic compound                   | [M-H] <sup>-</sup> (m/z) | MS <sup>2</sup> (m/z)   | MS <sup>3</sup> (m/z) | Mean content $\pm$ SE (n=6) |
|----------------|-------------------------------------|--------------------------|-------------------------|-----------------------|-----------------------------|
| PHENOLIC ACIDS |                                     |                          |                         |                       | 532.85 $\pm$ 47.16          |
| 1              | Protocatechuic acid                 | 153                      | 109                     |                       | 2.14 $\pm$ 0.19             |
| 2              | 3-Caffeoylquinic acid               | 353                      | 191, 179, 135           | 173, 127, 85          | 473.74 $\pm$ 41.66          |
| 7              | 4-Caffeoylquinic acid               | 353                      | 173, 179, 191           |                       | 11.93 $\pm$ 1.13            |
| 6              | 5-Caffeoylquinic acid               | 353                      | 191, 179, 173, 135      |                       | 19.81 $\pm$ 2.62            |
| 4              | Caffeic acid hexoside               | 341                      | 179                     |                       | 11.90 $\pm$ 1.29            |
| 5              | Sinapic acid                        | 223                      | 208, 179, 164           | 164, 149, 135         | 0.65 $\pm$ 0.06             |
| 5              | 3- <i>p</i> -Coumaroylquinic acid   | 337                      | 163                     |                       | 5.44 $\pm$ 0.51             |
| 11             | 4- <i>p</i> -Coumaroylquinic acid   | 337                      | 173, 163, 155, 137, 191 |                       | 0.77 $\pm$ 0.118            |
| 13             | 5- <i>p</i> -Coumaroylquinic acid 1 | 337                      | 191, 173, 163, 155      | 127, 93, 85           | 1.40 $\pm$ 0.24             |
| 15             | 5- <i>p</i> -Coumaroylquinic acid 2 | 337                      | 191, 173, 163,          |                       | 1.01 0.203                  |
| 7              | 3-Feruloylquinic acid 1             | 367                      | 193,134                 | 149                   | 1.07 $\pm$ 0.101            |
| 9              | 5-Feruloylquinic acid 2             | 367                      | 191                     | 173, 127, 85          | 0.54 $\pm$ 0.050            |
| 22             | Ellagic acid                        | 301                      | 271, 257, 229, 185      |                       | 2.46 $\pm$ 0.35             |
| FLAVANOLS      |                                     |                          |                         |                       | 375.21 $\pm$ 45.71          |
| 5              | Catechin                            | 289                      | 245, 205, 179, 261      | 203, 227              | 0.72 $\pm$ 0.0066           |
| 9              | Epicatechin                         | 289                      | 245, 205, 179, 261      | 203, 227, 161         | 38.59 $\pm$ 3.60            |
| 7              | Procyanidin dimer 1                 | 577                      | 451,425,407,289         |                       | 85.06 $\pm$ 8.08            |
| 3              | Procyanidin trimer 1                | 865                      | 577, 451, 425, 407, 289 |                       | 41.58 $\pm$ 4.24            |
| 10             | Procyanidin trimer 2                | 865                      | 577, 451, 425, 407, 289 |                       | 30.74 $\pm$ 3.30            |
| 14             | Procyanidin trimer 3                | 865                      | 577, 451, 425, 407, 289 |                       | 12.77 $\pm$ 2.31            |
| 16             | Procyanidin trimer 4                | 865                      | 577, 451, 425, 407, 289 |                       | 20.78 $\pm$ 4.70            |
| 8              | Procyanidin tetramer 1              | 1153                     | 865,803,425,451,559,289 |                       | 92.23 $\pm$ 14.71           |
| 12             | Procyanidin tetramer 2              | 1153                     | 865,863,425,451,559,287 |                       | 52.74 $\pm$ 8.06            |
| FLAVONES       |                                     |                          |                         |                       | 1.48 $\pm$ 0.314            |
| 26             | Apigenin hydroxyhexoside            | 449                      | 269                     | 225, 183, 151         | 1.48 $\pm$ 0.314            |
| FLAVANONES     |                                     |                          |                         |                       | 1.65 $\pm$ 0.275            |
| 17             | Naringenin hexoside 1               | 433                      | 271                     | 151                   | 0.968 $\pm$ 0.104           |

|           |                              |     |     |          |                   |
|-----------|------------------------------|-----|-----|----------|-------------------|
| 18        | Naringenin hexoside 2        | 433 | 271 | 151      | $0.321 \pm 0.080$ |
| 21        | Naringenin hexoside 3        | 433 | 271 | 151      | $0.36 \pm 0.101$  |
| FLAVONOLS |                              |     |     |          | $16.84 \pm 0.381$ |
| 19        | Quercetin-3-galactoside      | 463 | 301 | 179, 151 | $0.784 \pm 0.116$ |
| 20        | Quercetin-3-glucoside        | 463 | 301 | 179, 151 | $0.722 \pm 0.08$  |
| 18        | Quercetin-3-rutinoside       | 609 | 301 | 179, 151 | $0.558 \pm 0.139$ |
| 23        | Quercetin-pentoside          | 433 | 301 | 179      | $0.17 \pm 0.017$  |
| 17        | Quercetin dirhamnoside       | 593 | 447 | 301      | $0.484 \pm 0.052$ |
| 23        | Quercetin-rhamnosyl hexoside | 609 | 463 | 301      | $1.01 \pm 0.099$  |
| 17        | Laricitrin rhamnoside        | 477 | 331 |          | $0.807 \pm 0.087$ |
| 20        | Kaempferol hexoside 1        | 447 | 285 | 257, 229 | $0.031 \pm 0.004$ |
| 25        | Kaempferol hexoside 2        | 447 | 285 | 257, 229 | $0.322 \pm 0.044$ |
| 27        | Dihydrokaempferol hexoside   | 449 | 287 |          | $11.44 \pm 1.38$  |
| 18        | Isorhamnetin hexoside 1      | 477 | 315 | 300, 273 | $0.147 \pm 0.036$ |
| 24        | Isorhamnetin hexoside 2      | 477 | 315 | 300, 273 | $0.359 \pm 0.068$ |

\*Peak No....Peak number on the chromatogram (Figure 1).
